# RETRACTION

## Retraction: The cryoprotectant trehalose could inhibit ERS-induced apoptosis by activating autophagy in cryoprotected rat valves

Hongyan Wu, Qing Chang, The *PLOS ONE* Editors

Following publication of this article [1], the corresponding author informed the *PLOS ONE* Editors that he was not aware of the submission of the manuscript, which used a different email address to his, and he does not stand by the reported content of the article.

The *PLOS ONE* Editors have been unable to obtain the original data or verify that the study was conducted as reported. In light of the concerns raised, the authors and *PLOS ONE* Editors are issuing a retraction of the article.

QC, HW agreed with the retraction.

### Reference

1. Wu H, Chang Q (2018) The cryoprotectant trehalose could inhibit ERS-induced apoptosis by activating autophagy in cryoprotected rat valves. *PLoS ONE* 13(3): e0194078. <https://doi.org/10.1371/journal.pone.0194078> PMID: 29522567

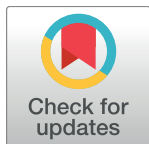

### OPEN ACCESS

**Citation:** Wu H, Chang Q, The *PLOS ONE* Editors (2018) Retraction: The cryoprotectant trehalose could inhibit ERS-induced apoptosis by activating autophagy in cryoprotected rat valves. *PLoS ONE* 13(7): e0201082. <https://doi.org/10.1371/journal.pone.0201082>

**Published:** July 17, 2018

**Copyright:** © 2018 Wu et al. This is an open access article distributed under the terms of the [Creative Commons Attribution License](https://creativecommons.org/licenses/by/4.0/), which permits unrestricted use, distribution, and reproduction in any medium, provided the original author and source are credited.
